# Supplementary material for: Resonance-assisted hydrogen bonds revisited. Resonance stabilization vs. charge delocalization
Source: Royal Society of Chemistry journal article supplement (doi:10.1039/c2cp43562d), 2012-12-12
Supplement: c2cp43562d.pdf [file c2cp43562d.pdf]

# Electronic Supplementary Information (ESI) for: Resonance-Assisted Hydrogen Bonds Revisited. Resonance Stabilization vs. Charge Delocalization

Robert W. Góra,<sup>\*a</sup> Michał Maj,<sup>a‡</sup> and Sławomir Grabowski<sup>b</sup>

November 30, 2012

**Table 1** Interaction energy components and the basis set extension effects estimated at MP2 level of approximation. All energies are in kJ/mol

| dimer of             | $\Delta E^{\text{HL}}$ | $\epsilon_{\text{el}}^{(1)}$ | $\epsilon_{\text{ex}}^{\text{HL}}$ | $\Delta E_{\text{del}}^{\text{HF}}$ | $\Delta E^{\text{HF}}$ | $\epsilon_{\text{MP}}^{(2)}$ | $\epsilon_{\text{el,r}}^{(12)}$ | $\epsilon_{\text{disp}}^{(2)}$ | $\Delta E_{\text{ex}}^{(2)}$ | $\Delta E^{\text{MP2}}$ |
|----------------------|------------------------|------------------------------|------------------------------------|-------------------------------------|------------------------|------------------------------|---------------------------------|--------------------------------|------------------------------|-------------------------|
| AUG-cc-pVDZ          |                        |                              |                                    |                                     |                        |                              |                                 |                                |                              |                         |
| formic acid          | 8.4                    | -137.2                       | 146.0                              | -73.2                               | -64.4                  | -4.2                         | 5.0                             | -39.7                          | 30.5                         | -68.6                   |
| acetic acid          | 8.8                    | -144.8                       | 153.6                              | -75.3                               | -66.5                  | -5.4                         | 4.6                             | -42.3                          | 32.2                         | -72.0                   |
| trifluoroacetic acid | 15.5                   | -123.8                       | 139.3                              | -74.1                               | -58.6                  | -6.7                         | 4.2                             | -39.3                          | 28.5                         | -64.9                   |
| formamide            | -7.5                   | -111.3                       | 103.8                              | -46.0                               | -53.6                  | -7.5                         | 3.8                             | -33.5                          | 22.2                         | -61.1                   |
| acetamide            | -5.4                   | -115.9                       | 110.5                              | -48.5                               | -54.0                  | -9.2                         | 2.9                             | -35.6                          | 23.4                         | -63.2                   |
| trifluoroacetamide   | -7.5                   | -106.3                       | 98.7                               | -45.2                               | -53.1                  | -7.9                         | 5.0                             | -32.6                          | 20.1                         | -61.1                   |
| AUG-cc-pVTZ          |                        |                              |                                    |                                     |                        |                              |                                 |                                |                              |                         |
| formic acid          | 14.2                   | -144.8                       | 159.0                              | -79.9                               | -65.7                  | -9.6                         | 5.9                             | -46.9                          | 31.4                         | -75.3                   |
| acetic acid          | 14.2                   | -151.9                       | 166.1                              | -82.0                               | -67.8                  | -11.3                        | 5.4                             | -49.4                          | 33.1                         | -78.7                   |
| trifluoroacetic acid | 20.1                   | -130.1                       | 150.2                              | -78.7                               | -58.6                  | -7.1                         | 3.8                             | -41.0                          | 30.1                         | -65.3                   |
| formamide            | -4.6                   | -112.5                       | 107.9                              | -47.3                               | -51.9                  | -12.1                        | 4.2                             | -37.7                          | 21.8                         | -64.0                   |
| acetamide            | -3.3                   | -116.3                       | 113.4                              | -49.0                               | -52.3                  | -13.8                        | 3.3                             | -39.7                          | 22.6                         | -66.1                   |
| trifluoroacetamide   | -5.4                   | -107.9                       | 102.5                              | -46.4                               | -51.9                  | -12.1                        | 5.4                             | -36.8                          | 19.2                         | -64.0                   |
| AUG-cc-pVQZ          |                        |                              |                                    |                                     |                        |                              |                                 |                                |                              |                         |
| formic acid          | 13.0                   | -143.5                       | 156.5                              | -78.7                               | -65.3                  | -11.7                        | 6.3                             | -48.1                          | 30.1                         | -77.4                   |
| acetic acid          | 13.4                   | -150.6                       | 164.0                              | -80.8                               | -67.4                  | -13.4                        | 5.4                             | -50.6                          | 31.8                         | -80.8                   |
| formamide            | -5.9                   | -110.9                       | 105.4                              | -46.0                               | -51.9                  | -13.8                        | 4.2                             | -38.5                          | 20.9                         | -65.3                   |
| acetamide            | -3.3                   | -116.3                       | 113.4                              | -49.0                               | -52.3                  | -15.5                        | 3.4                             | -41.1                          | 22.2                         | -67.7                   |

**Table 2** The selected AIM descriptors (in a.u.), estimated for various substituted MDA derivatives using MP2/6-31+G(d,p) method.

| R <sub>1</sub> | R <sub>2</sub>    | $\rho(\mathbf{r}_{\text{BCP}})$ | $\nabla^2\rho(\mathbf{r}_{\text{BCP}})$ | $H(\mathbf{r}_{\text{BCP}})$ |
|----------------|-------------------|---------------------------------|-----------------------------------------|------------------------------|
| -              | -                 | 0.0543                          | 0.1522                                  | -0.0051                      |
| -              | -F                | 0.0361                          | 0.1053                                  | -0.0018                      |
| -              | -Cl               | 0.0405                          | 0.1193                                  | -0.0020                      |
| -              | -OH               | 0.0295                          | 0.0901                                  | -0.0013                      |
| -              | -CF <sub>3</sub>  | 0.0499                          | 0.1418                                  | -0.0038                      |
| -              | -OCH <sub>3</sub> | 0.0485                          | 0.1418                                  | -0.0032                      |
| -F             | -F                | 0.0331                          | 0.0970                                  | -0.0016                      |
| -Cl            | -Cl               | 0.0544                          | 0.1536                                  | -0.0049                      |
| -OH            | -OH               | 0.0371                          | 0.1126                                  | -0.0015                      |
